## RESEARCH ARTICLE

# Intraflagellar transport during assembly of flagella of different length in *Trypanosoma brucei* isolated from tsetse flies

Eloïse Bertiaux<sup>1,2</sup>, Adeline Mallet<sup>1,2,3</sup>, Brice Rotureau<sup>1</sup> and Philippe Bastin<sup>1,\*</sup>

## ABSTRACT

Multicellular organisms assemble cilia and flagella of precise lengths differing from one cell to another, yet little is known about the mechanisms governing these differences. Similarly, protists assemble flagella of different lengths according to the stage of their life cycle. *Trypanosoma brucei* assembles flagella of 3 to 30 µm during its development in the tsetse fly. This provides an opportunity to examine how cells naturally modulate organelle length. Flagella are constructed by addition of new blocks at their distal end via intraflagellar transport (IFT). Immunofluorescence assays, 3D electron microscopy and live-cell imaging revealed that IFT was present in all *T. brucei* life cycle stages. IFT proteins are concentrated at the base, and IFT trains are located along doublets 3–4 and 7–8 and travel bidirectionally in the flagellum. Quantitative analysis demonstrated that the total amount of flagellar IFT proteins correlates with the length of the flagellum. Surprisingly, the shortest flagellum exhibited a supplementary large amount of dynamic IFT material at its distal end. The contribution of IFT and other factors to the regulation of flagellum length is discussed.

**KEY WORDS:** Cilia, Flagella, Organelle length, Intraflagellar transport, Trypanosomes, Tsetse fly

## INTRODUCTION

Cilia and flagella are typical eukaryotic organelles found in numerous organisms. They share a similar architecture based on a cylinder of nine doublet microtubules (with an additional central pair for most motile organelles) but their length varies substantially from one organism to the other and even from one cell type to another within the same organism. Several proteins involved in ciliary length control have been identified, but the actual mechanisms regulating this length are still debated (Broekhuis et al., 2013; Goehring and Hyman, 2012; Ishikawa and Marshall, 2017; Keeling et al., 2016; Lechtreck et al., 2017). These organelles are constructed by addition of new subunits at their distal end (Bastin et al., 1999; Johnson and Rosenbaum, 1992). Since flagella do not contain ribosomes, a transport process called intraflagellar transport (IFT) is required to bring precursors from the cytoplasm of the cell body to the assembly site (Craft et al., 2015; Kozminski

et al., 1993; Wren et al., 2013). IFT is the movement of large protein arrays (or trains) made of 20 IFT proteins driven by molecular motors – kinesin II for anterograde transport and cytoplasmic dynein 2 for retrograde transport (Prevo et al., 2017). This process is conserved in all organisms assembling cilia and flagella on a protrusion of the cell body (Avidor-Reiss and Leroux, 2015).

Because of its central function in flagellum construction, IFT is a prime candidate for flagellum length regulation. In *Chlamydomonas reinhardtii* and *Caenorhabditis elegans*, cilia and flagella undergo turnover of tubulin at their distal end, and their length has been proposed to be the result of a balance between assembly and disassembly rates (Hao et al., 2011; Marshall and Rosenbaum, 2001). These rates can be modulated by changes in train length (Engel et al., 2009) and frequency (Ludington et al., 2013), and/or by loading of flagellar precursors on trains (Craft et al., 2015; Wren et al., 2013). The molecular mechanisms controlling these parameters remain to be elucidated, with protein phosphorylation emerging as a potential candidate (Liang et al., 2018; Wang et al., 2019). The majority of these studies have been performed in the green algae *Chlamydomonas*, which is a powerful model for the study of flagellum assembly. It constructs two flagella of equivalent length that can be manipulated by various genetic and biochemical approaches (Dutcher, 2014).

Although these manipulations offer great tools to investigate the mechanisms involved in flagellum length control, they might not necessarily reflect the main pathways by which cells control the length of their organelle in natural conditions. In that context, protists are interesting organisms, as they can naturally assemble flagella of different lengths according to their stage of development. Some of them even possess several types of flagella in the same cell, implying the need to discriminate between them, both in terms of construction and function (Bertiaux and Bastin, 2020; Bertiaux et al., 2018b; McNally et al., 2019). *Trypanosoma brucei* is a typical example and exhibits multiple life cycle stages characterised by flagella ranging from 3 µm to more than 30 µm (Rotureau et al., 2011; Sharma et al., 2008; Van Den Abbeele et al., 1999) (Fig. 1). It therefore offers the possibility to investigate which parameters are modulated to build flagella of different length.

Trypanosomes are parasites infecting mammals via the bite of the tsetse fly. In mammals, they are found at the bloodstream form stage (Fig. 1). In the insect, they first develop in the midgut as the procyclic stage. Cells at this stage possess a single flagellum that is attached to the cell body and emerges from the posterior end of the cell. This configuration is termed trypomastigote (Fig. 1). This stage is proliferative and can be grown in culture. Trypanosomes then transform into the so-called mesocyclic stage (Rotureau et al., 2011; Sharma et al., 2008; Van Den Abbeele et al., 1999), which is defined by the presence of a longer flagellum. However, since there are no molecular markers and that these cells seem to be able to revert at the procyclic stage in certain conditions (Van Den Abbeele et al., 1999), we prefer to use the term long trypomastigote (Fig. 1). These parasites migrate to the cardia (proventriculus) and

<sup>1</sup>Trypanosome Cell Biology Unit, INSERM U1201, Institut Pasteur, 25 Rue du Docteur Roux, 75015 Paris, France. <sup>2</sup>Sorbonne Université école doctorale complexité du vivant, ED 515, 7, quai Saint-Bernard, case 32, 75252 Paris Cedex 05, France. <sup>3</sup>Ultrastructural Bio Imaging Unit, C2RT, Institut Pasteur, 25 Rue du Docteur Roux, 75015 Paris, France.

\*Author for correspondence (pbastin@pasteur.fr)

ORCID: E.B., 0000-0001-6593-083X; B.R., 0000-0003-0671-8999; P.B., 0000-0002-3042-8679

Handling Editor: David Stephens  
Received 14 May 2020; Accepted 10 August 2020

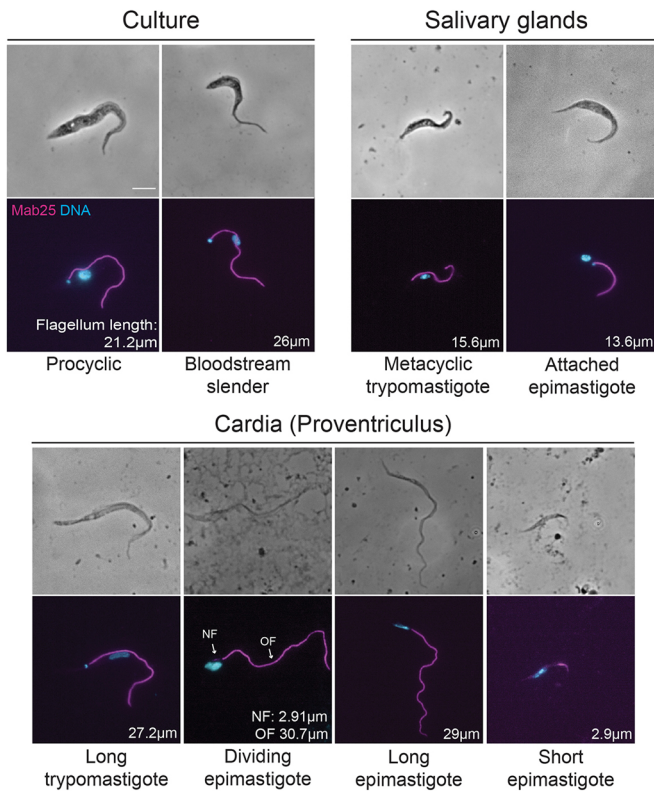

**Fig. 1. Evolution of flagellum length during the parasite cycle.** The main morphological stages of the *T. brucei* parasite cycle encountered in the tsetse fly vector are presented, as well as the two forms that can be grown in culture. Parasites were fixed with cold methanol and stained with DAPI (cyan) and the Mab25 antibody (magenta) that recognises an axoneme component (Dacheux et al., 2012). Flagellum length was measured using the Mab25 marker and is indicated for each stage. Data is from Rotureau et al. (2011), with the exception of dividing epimastigote cells that were specifically analysed in this study ( $n=37$ ). Scale bar: 5  $\mu\text{m}$ .

concomitantly undergo exhaustive morphogenetic modifications to become epimastigote (Lemos et al., 2020; Sharma et al., 2008). The epimastigote configuration is defined by the emergence of the flagellum at the anterior part of the cell (Fig. 1). These cells divide asymmetrically, producing a long epimastigote daughter that inherits the old flagellum ( $\sim 30 \mu\text{m}$ ) and a short epimastigote daughter with a tiny flagellum ( $\sim 3 \mu\text{m}$ ) (Fig. 1). Once parasites have reached the salivary glands, they attach to the epithelium via large outgrowths of the flagellar membrane (Tetley and Vickerman, 1985), constituting the attached epimastigote stage, then switch to the trypomastigote configuration during the emergence of the metacyclic stage (Fig. 1) that is released in the saliva and ready for transmission. The mechanisms governing the formation of these different types of flagella are unknown. Investigation has been complicated by the absence of cultivation system for most of these stages and therefore requires analysis of parasites extracted from infected tsetse flies.

All IFT-encoding genes are conserved in trypanosomes (Morga and Bastin, 2013), and functional investigation by means of RNAi knockdown has revealed that they are essential for flagellum construction (Absalon et al., 2008; Davidge et al., 2006; Franklin and Ullu, 2010; Kohl et al., 2003). IFT trafficking itself has been investigated exhaustively in the procyclic stage, which is amenable to cell culture and manipulation. The frequency and speed of anterograde ( $\sim 1$  train/s and  $\sim 2 \mu\text{m/s}$ ) and retrograde trafficking ( $\sim 2$ – $3$  trains/s and  $\sim 5 \mu\text{m/s}$ ) have been determined using live analysis of the movement of various IFT proteins such as IFT22

(Adhiambo et al., 2009), IFT25 (Huet et al., 2019), IFT27 (Huet et al., 2014), IFT52 (Buisson et al., 2013) and IFT81 (Bhogaraju et al., 2013), as well as several subunits of the dynein motors (Blisnick et al., 2014).

Here, we investigated IFT in several natural life cycle stages of *T. brucei*, which exhibit flagella of different lengths. We mostly focused on trypanosomes present in the anterior midgut and the cardia of infected tsetse flies where the most extreme differences in flagellum length have been reported (Rotureau et al., 2011; Sharma et al., 2008; Van Den Abbeele et al., 1999). Conventional transmission electron microscopy and focused ion beam scanning electron microscopy (FIB-SEM) revealed the presence of IFT trains in the flagellum of trypanosomes found in the cardia. Immunofluorescence assays using two different antibodies and monitoring of live trypanosomes expressing a fluorescent IFT protein showed the presence of IFT in all stages analysed, from procyclic in the midgut to metacyclic in the saliva. IFT trafficking was clearly visible in all cells observed; however, video recording turned out to be extremely challenging due to the high flagellum beating rate and the difficulty in immobilising cells without damage. Nevertheless, quantification of the IFT amount could be achieved in fixed cells for all stages and live IFT tracking was successful in certain stages. In both cases, the total amount of IFT material in the flagellum was directly correlated to flagellum length. By contrast, the IFT concentration per unit of flagellum length appeared constant. The only exception was the tiny flagellum of the short epimastigote form, which contained a supplementary and dynamic pool of IFT proteins at its distal end that could contribute to its elongation in the next developmental stage. Finally, several experiments were performed in an effort to understand why flagellum length is so short at that particular stage.

## RESULTS

Different methods are available for probing IFT: visualisation by electron microscopy, detection of IFT proteins by immunofluorescence in fixed cells, and recording of IFT trafficking in live cells following expression of IFT proteins fused to fluorescent proteins. All these approaches were attempted here.

### IFT trains are detected in trypanosomes developing in the tsetse fly

IFT trains were first identified by correlative light and electron microscopy (Kozminski et al., 1995) as electron-dense particles sandwiched between microtubule doublets and the flagellar membrane of *Chlamydomonas* (Ringo, 1967). In *T. brucei*, similar densities are visible in sections of bloodstream form trypanosomes isolated from rats (Vickerman, 1962) or of procyclic form parasites grown in culture (Sherwin and Gull, 1989).

To look for IFT trains in various stages of *T. brucei*, we infected tsetse flies with the AnTat 1.1E strain and dissected the cardia, where cells with the shortest and longest flagella are encountered (Fig. 1). The cardia is a relatively large organ (Fig. S1A) and, although parasites can be found at fairly high densities, it is essential to probe the sample for presence of trypanosomes before performing sections for electron microscopy. First, we made semi-thin sections (500 nm) and stained them with Toluidine Blue (Fig. S1B). Once regions with sufficient parasite density were detected, ultrathin sections were made. Observation at low magnification by transmission electron microscopy (TEM) revealed the presence of multiple parasites in various orientations (Fig. 2A,B). Classic trypanosome organelles were frequently observed, such as the nucleus, the mitochondrion and acidocalcisomes, as well as the characteristic subpellicular

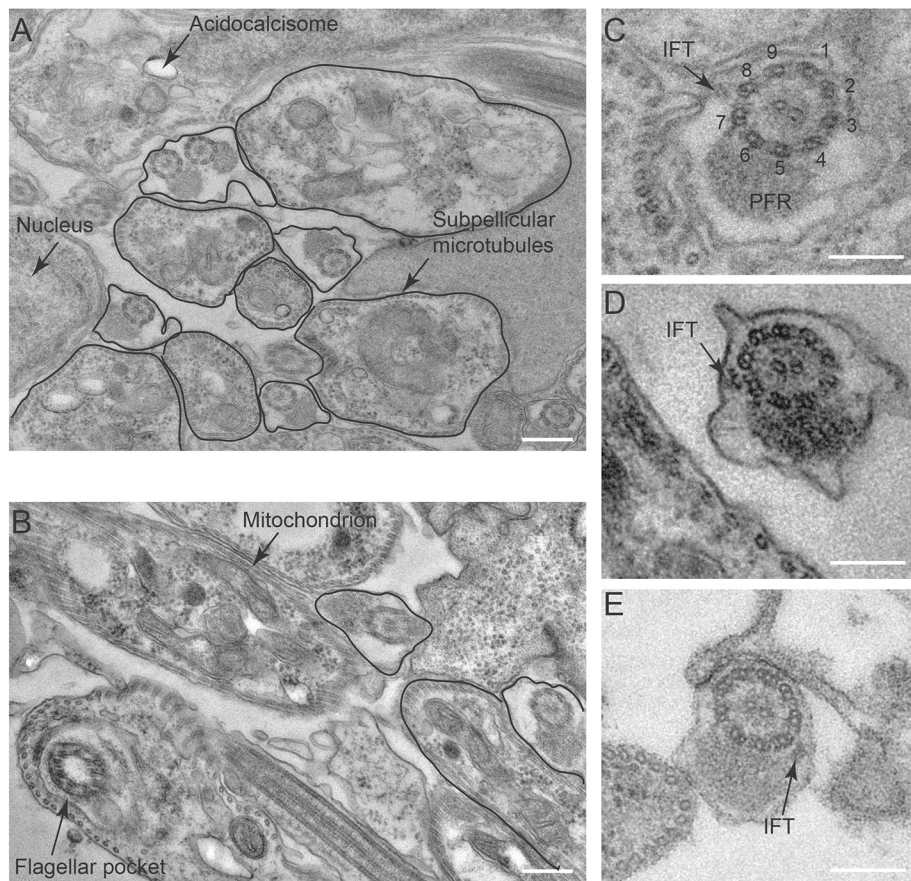

**Fig. 2. IFT trains are present in the flagellum of parasites found in the cardia.** (A,B) Sections at low magnification of fields showing tsetse fly cardia infected by *T. brucei* parasites. Typical organelles, such as the nucleus, an acidocalcisome, the subpellicular microtubules (A) and the flagellar pocket or the mitochondrion (B) are indicated. Multiple sections through flagella are visible. (C–E) Higher magnification of flagellum sections with IFT particles positioned close to doublets 7–8 (C and D) or doublet 4 (E). The numbering of doublets and the paraflagellar rod (PFR) are indicated on C. Scale bars: 200 nm (A,B); 100 nm (C–E).

microtubules (Fig. 2A,B). Sections through the base of the flagellum revealed the flagellar pocket and its collar, from which the flagellum emerges at the cell surface (Fig. 2A,B). Multiple flagellum sections were visible, with the presence of the canonical axoneme and of the associated paraflagellar rod (PFR). These images confirm that trypanosomes present in the cardia display the typical cytological organisation as reported in other stages. Examples of flagellum cross sections at higher magnification are presented at Fig. 2C–E. The nine doublets can be numbered unambiguously thanks to the fixed orientation of the central pair and the associated PFR (Fig. 2C). Densities equivalent to IFT trains were frequently observed between the membrane and the microtubules (Fig. 2C–E) and they were mostly encountered in proximity of doublets 3–4 (Fig. 2E) or 7–8 (Fig. 2C, D), as observed in procyclic cells (Absalon et al., 2008; Bertiaux et al., 2018a).

Thin sectioning does not allow the identification of the parasite stage and we therefore turned to FIB-SEM for further analysis. Using the same approach as above with semi-thin sectioning, we identified a region that was suitable for milling by FIB (Fig. S1). Several series were acquired with a 10 nm Z-resolution. In the volume presented, a total of 722 sections were performed (Movie 1; Fig. 3). On that sample, the epithelium of the cardia is present on the right-hand side, and trypanosomes can be found towards the bottom left. Three images corresponding to slices 225, 298 and 374 are presented (Fig. 3A). The flagellum highlighted at Fig. 3 is visible on 470 consecutive slices (Movie 1). The presence of the flagellum attachment zone (FAZ, Fig. 3B) allows the identification of the cell body it belongs to. Although the base of the flagellum is not in the volume, the nucleus is visible on the first ~200 slices with the attached flagellum, indicating that this cell is not at the

epimastigote stage. Based on the diameter of the cell body, this cell is likely to transit between the long trypomastigote and the epimastigote stage (Lemos et al., 2020; Sharma et al., 2008). Looking at that flagellum more closely, a train is visible in proximity of doublet 8 at image 114 and stretches until section 315 (Movie 1; Fig. 3B, left and central panels). A computational section revealing the whole IFT train in longitudinal section is shown in Fig. 3C. A second train is present on that same flagellum, but this time in vicinity of doublet 4 on image 359 until image 396 (Movie 1; Fig. 3B, right panel). This distribution is similar to that reported in procyclic trypanosomes grown in culture (Bertiaux et al., 2018a). Despite careful analysis, we could not find a short epimastigote in the two volumes analysed (Lemos et al., 2020). Although FIB-SEM offers excellent conditions to identify IFT trains and determine their positioning, finding all the stages of interest is like looking for a needle in a haystack, and we therefore turned towards light microscopy for quantitative analysis of IFT using immunofluorescence with anti-IFT antibodies and live-cell analysis upon expression of IFT fluorescent fusion proteins.

#### IFT protein amounts correlate with flagellum length at all stages of the parasite cycle

In procyclic trypanosomes in culture, IFT proteins are progressively recruited during flagellum elongation with a direct correlation between IFT total amounts and actual flagellum length, while the frequency of injection and the concentration of IFT proteins per unit of length remain unchanged (Bertiaux et al., 2018b). Similar features have been reported recently in the different pairs of flagella in *Giardia* (McInally et al., 2019). To evaluate the possible link between IFT amounts and flagellum length when trypanosomes

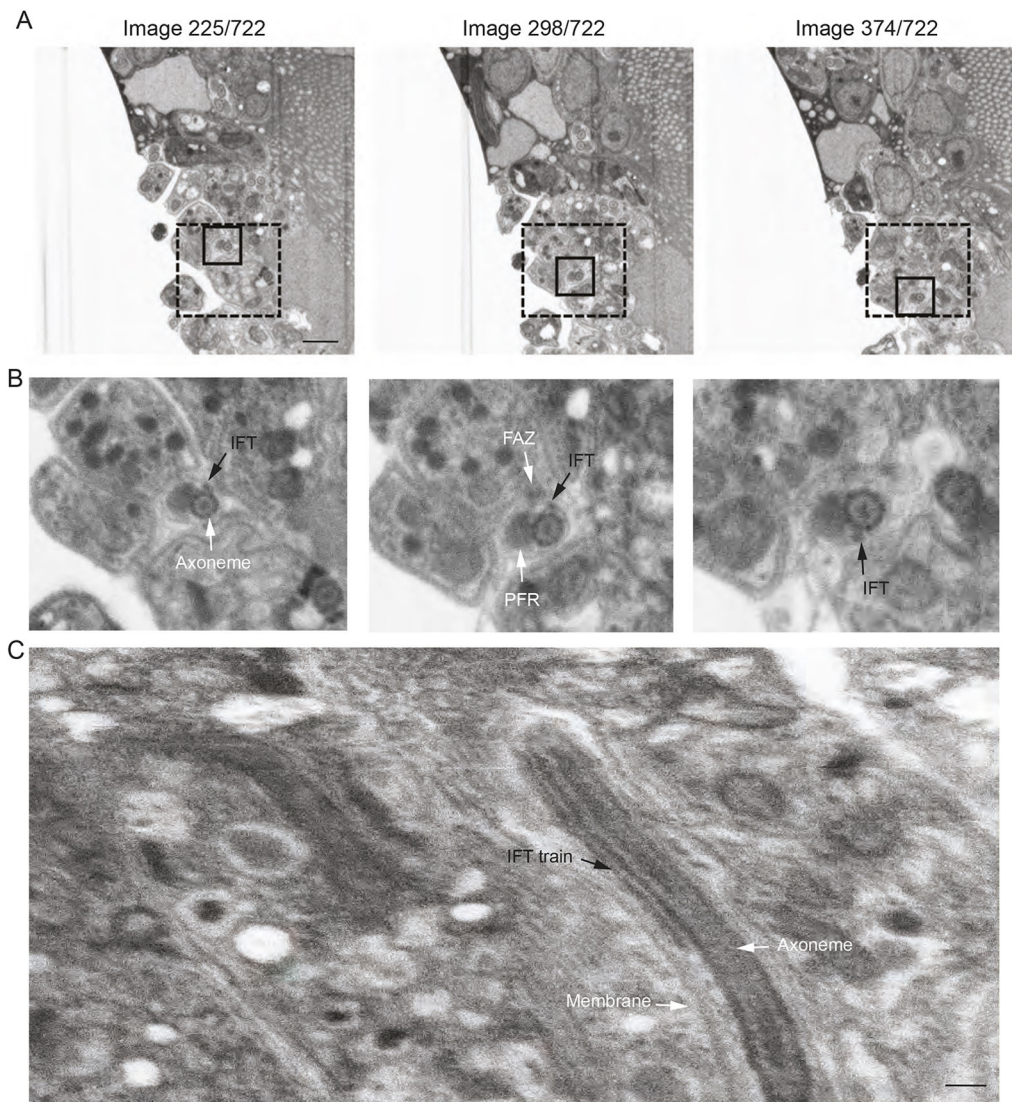

**Fig. 3. IFT train distribution as revealed by 3D electron microscopy.** (A) A portion of the cardia infected with trypanosomes was analysed by FIB-SEM. Three images extracted from Movie 1 are presented at low magnification (position in the stack is indicated on top of each image). Several trypanosomes are visible on the left-hand side while tsetse tissues are on the right-hand side. The dashed squares indicate the ROI that is shown in Movie 1. The square shown with solid lines indicates the portion that is shown at higher magnification in B. Scale bar: 800 nm (B) Each image comes from the field shown above. IFT particles are indicated, with a long train found on doublet 8 (left and centre images) and a shorter one present on doublet 4 (right image). The presence of the FAZ confirms which cell body the flagellum belongs to. The full sequence is presented in Movie 1. (C) Computational section showing the whole IFT train in longitudinal view. The IFT train is indicated, as well as the flagellum membrane and the axoneme (white arrows). Scale bar: 200 nm.

assemble different flagella during their life cycle, the distribution of IFT proteins was investigated in fixed cells coming either from infected flies or from cultured bloodstream and procyclic stages. Immunofluorescence assays (IFAs) with antibodies raised against IFT172 (Fig. 4A) (Absalon et al., 2008) or IFT22 (also known as RABL5) (Fig. S2) (Adhiambo et al., 2009) were performed in combination with the antibody Mab25, recognising TbSAXO1 a protein found all along the trypanosome axoneme (Dacheux et al., 2012; Pradel et al., 2006). For all parasite stages, IFT proteins were present as a succession of diffuse spots all along the length of the flagellum, with a brighter signal at the base present in almost all stages except in short epimastigote cells (Fig. 4A; Fig. S2).

To quantify the total amount of IFT22 or IFT172 protein per flagellum, a region of interest (ROI) was defined using the Mab25 axonemal marker (shown in magenta in the figures). The total amount of fluorescence, corresponding to the total amount of IFT proteins present in the flagellum, was plotted against flagellum length. For both IFT proteins, a direct correlation between the total amount of IFT proteins and the length of the corresponding flagellum was found (Fig. 4B; Fig. S1B). These data suggest that the total amount of IFT protein in the flagellum correlates with the length of the flagellum at all stages of the parasite cycle.

### IFT trafficking displays similar rates and frequency during all of the parasite cycle

The methanol fixation classically used for IFAs could lead to the loss of some IFT material and therefore bias in the results. Moreover, IFAs only provide static information whereas IFT is a dynamic process. To circumvent these potential issues, the distribution of IFT proteins was examined in live trypanosomes expressing a fusion protein between the IFT-B protein IFT81 and the red fluorescent Tandem Tomato protein (TdT) (Bertiaux et al., 2018b). This fusion protein is expressed upon endogenous tagging under the control of the 3' untranslated region (UTR) of the *IFT81* gene (Bhogaraju et al., 2013). The cell line expressing this fusion protein was fed to tsetse flies that were dissected 1 month later. The TdT::IFT81 protein was detected in live trypanosomes at all the different stages of the parasite cycle: procyclic cells in the midgut; parasites at the long trypomastigote, dividing epimastigote, long and short epimastigote stages in the cardia; and attached epimastigote form and metacyclic form parasites in the salivary glands (Fig. 5A; Movies 2–4). In all cases, a higher concentration of IFT proteins was detected at the base of the flagellum, and IFT trafficking was visible without ambiguity (Fig. 5A; Movies 2–4). The only major difference in IFT protein distribution was noticed in short epimastigote cells (see below).

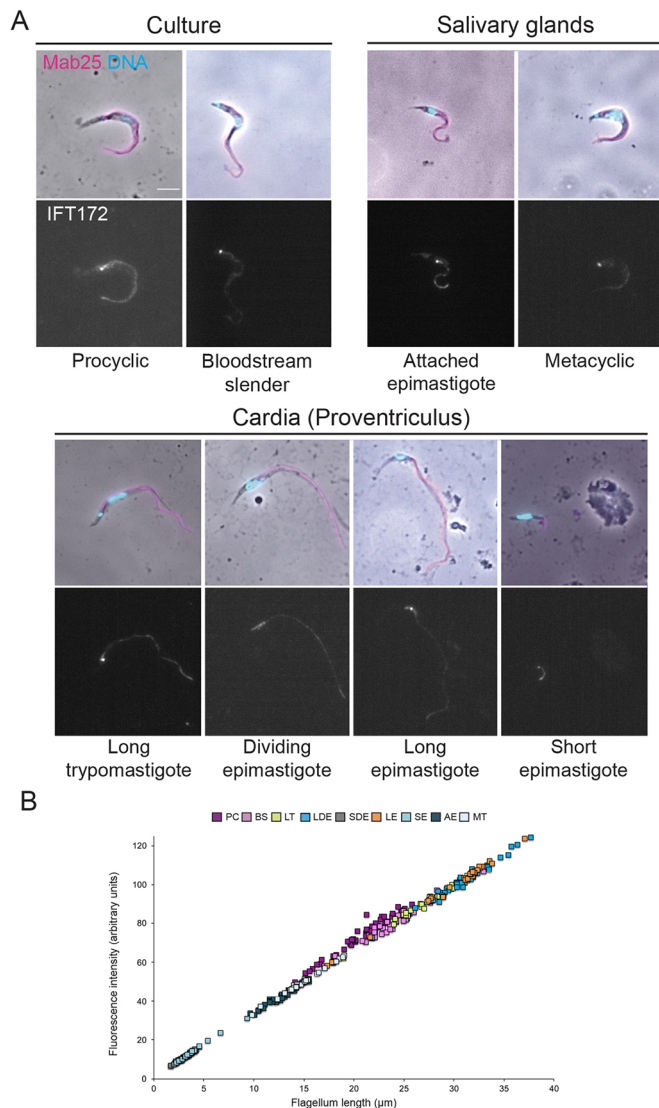

**Fig. 4. IFT172 distribution during the *T. brucei* parasite cycle.** (A) Parasites isolated from tsetse flies or grown in culture were fixed in cold methanol and stained with the Mab25 antibody to detect the axoneme (magenta) and the anti-IFT172 antibody (white). The top panels show the phase-contrast images merged with DAPI (cyan) and Mab25 signals (magenta). The bottom ones show the IFT172 fluorescence signal (white). Scale bar: 5 µm.

(B) Quantification of the total amount of IFT172 fluorescence signal in the flagellum normalised to flagellum length for each stage of the parasite cycle. The ROI was defined by the axonemal marker and used to measure the flagellum length. The fluorescence intensity directly reflects the total amount of IFT172 proteins present in the flagellum compartment.  $n=35$  cells per stage. BSF, slender bloodstream form; PC, procyclic form; LT, long trypanomastigote; LDE, long dividing epimastigote; SDE, short dividing epimastigote; LE, long epimastigote, SE, short epimastigote, AE, attached epimastigote; MT, metacyclic trypanomastigote.

IFT quantification requires visualisation of the full-length flagellum in the same plane of focus. To restrict flagellum beating, trypanosomes isolated from the cardia of infected flies were mixed with low-melting-point agar. This could immobilise most procyclic and some long trypanomastigote or some short epimastigote cells. Unfortunately, long epimastigote or dividing epimastigote cells remained too motile in these conditions, and all other attempts to immobilise them were unsuccessful, precluding a quantitative analysis for these two stages. Live imaging was therefore only

feasible for long trypanomastigote (flagellum length between 20 to 30 µm) and short epimastigote cells (flagellum length  $\sim 5$  µm). The total amounts of TdT::IFT81 in the flagellum were quantified in live cells of these two stages by using the first image of each movie, and the results were plotted according to flagellum length (Fig. 5B). This demonstrated the direct correlation between these two parameters in live cells, in agreement with the IFA data (Fig. 4B; Fig. S1).

Although the total amount of IFT proteins appeared to be proportional to the length of the flagellum, modifications of IFT speed and frequency cannot be excluded and could have an impact on the flagellum growth rate (Bertiaux et al., 2018b). Therefore, TdT::IFT81 trafficking was investigated in details with kymograph analyses (Buisson et al., 2013) in cells with a short (short epimastigote) or a long flagellum (procyclic and long trypanomastigote forms). In the flagellum of short epimastigote cells, anterograde trains travelled at  $2.4 \pm 1.3$  µm  $s^{-1}$  and retrograde trains at  $5.6 \pm 3.1$  µm  $s^{-1}$  (mean  $\pm$  s.d.; Fig. 5C,E,  $n=13$ ). In the flagellum of long trypanomastigote or procyclic cells, anterograde trains travelled at  $2.1 \pm 0.7$  µm  $s^{-1}$  and retrograde trains at  $5.6 \pm 1.7$  µm  $s^{-1}$  (Fig. 5C,E,  $n=26$ ). Next, the IFT frequency was evaluated. In the short epimastigote flagellum, the frequency of anterograde IFT was  $1.2 \pm 0.4$  trains per second and  $2.0 \pm 0.7$  trains per second for retrograde IFT (Fig. 5D,F). In the long trypanomastigote/procyclic flagellum, the anterograde IFT frequency was similar, with  $1.22 \pm 0.3$  trains/s while the retrograde IFT frequency was  $2.1 \pm 0.1$  trains/s (Fig. 5D,F). There were no statistical differences of speed and frequency between the two stages based on a Student's *t*-test. It should be noted that these speed and frequency values are slightly higher compared to the movement of the same TdT::IFT81 protein measured previously in cultured procyclic parasites (Bertiaux et al., 2018b). This is possibly a consequence of the temperature increase likely to occur after mixing the cell suspension with warm liquid agar. Indeed, temperature can affect IFT rates and frequency as reported in trypanosomes (Buisson et al., 2013) and *Caenorhabditis elegans* (Jensen et al., 2018).

In conclusion, these results show that IFT speeds and frequencies are equivalent in cells with long and short flagella. Modulation of these parameters can therefore not explain the changes in flagellum length observed during *T. brucei* development.

#### Unique IFT protein distribution in short epimastigote flagella

Immunofluorescence and live-cell studies showed that IFT proteins were found in discrete spots along the flagellum and concentrated at the base of the flagellum in all trypanosome cell types. However, methanol fixation showed a lower abundance of the IFT pool at the flagellum base of short epimastigotes compared to that in the other stages (Fig. 4A; Fig. S1A). To understand whether it was real or if it was the mere consequence of fixation, live cells expressing the TdT::IFT81 were examined more closely. By eye, the IFT signal at the base indeed looked less intense but, surprisingly, a rather large IFT pool was detected at the distal end of these short flagella (Fig. 6A; Movie 4). This was investigated by quantitative analysis of the TdT::IFT81 fluorescence signal at the base, along the flagellum and at the distal tip in short epimastigote cells ( $n=17$ ), using midgut trypanomastigote cells as controls ( $n=22$ ). While the tip of the flagellum in control cells contained a reduced amount of IFT proteins (Fig. 6A,B), a really large IFT pool was detected at the distal tip of the short epimastigote flagellum (Fig. 6C) that turned out to be twice as abundant as the pool found at the base (Fig. 6D). This is in contrast to control midgut cells where the IFT signal at the tip was 4- to 5-fold lower compared to the base (Fig. 6B). This large amount of material could be engaged in IFT or simply be inactive,

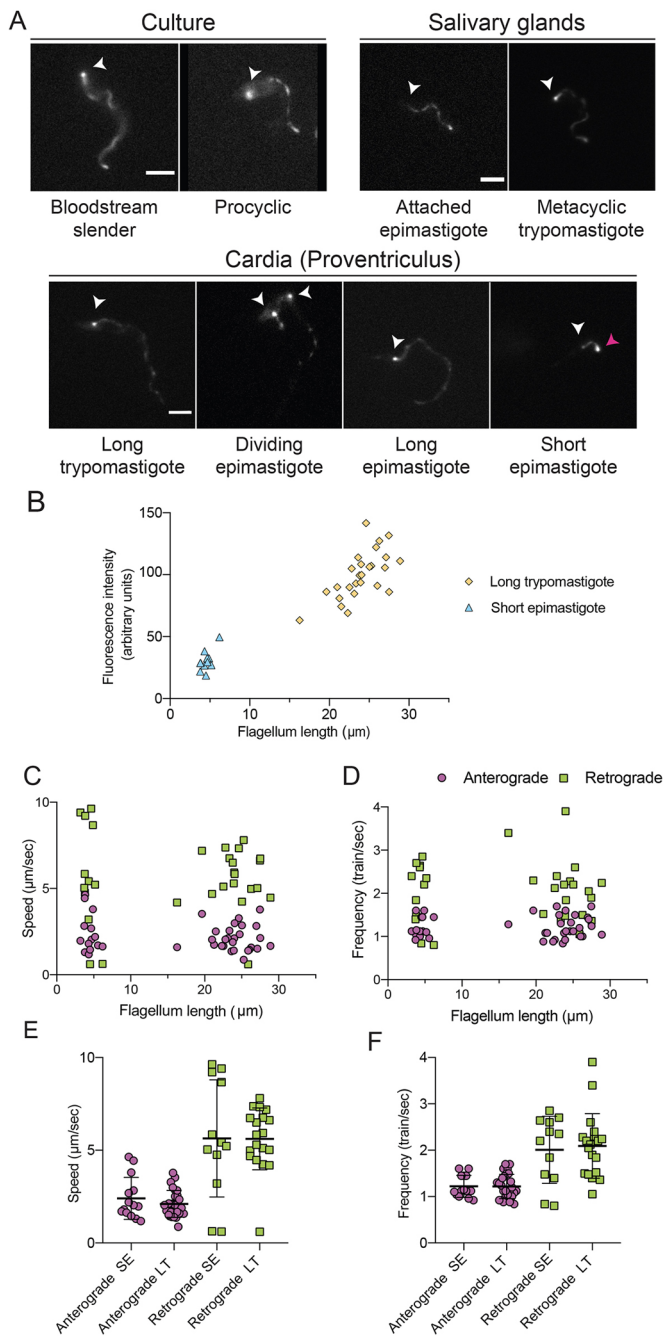

**Fig. 5. Variation of IFT81 trafficking during the *T. brucei* parasite cycle.** (A) Still images extracted from movies of trypanosomes expressing a TdTomato::IFT81 from the endogenous locus at the indicated stages of the parasite cycle either from cultured forms or extracted from infected tsetse flies. White arrowheads indicate the base of the flagellum and the magenta arrowhead points at the flagellum tip of a short epimastigote cell. Corresponding videos are presented as Movie 2 (culture stages), Movie 3 (parasites from the salivary glands) and Movie 4 (parasites from the cardia). Scale bars: 5  $\mu\text{m}$ . (B) The total TdTomato::IFT81 fluorescence intensity in flagella of short epimastigote (blue triangles) and long trypomastigote cells (yellow diamonds) was calculated and plotted according to the length of the corresponding flagella. (C) IFT speeds (anterograde transport, magenta circles; retrograde transport, green squares) in the flagella of short epimastigote and long trypomastigote cells were calculated and plotted according to the respective length of the flagella. Retrograde transport is more difficult to detect, and data were therefore only incorporated when the signal was sufficiently intense and reliable. (D) IFT particle frequencies (anterograde transport, magenta circles; retrograde transport, green squares) in the flagellum of short epimastigote cells and long trypomastigote cells were calculated and plotted according to the respective length of the flagella. (E) IFT particle speeds (anterograde transport, magenta circles; retrograde transport, green squares) in the flagella of short epimastigote (SE) and long trypomastigote (LT) cells were determined using kymograph analysis. (F) IFT particle frequencies (anterograde transport, magenta circles; retrograde transport, green squares) in the flagellum of short epimastigote (SE) cells and long trypomastigote (LT) cells were calculated using kymograph analysis. Error bars show mean  $\pm$  s.d.

(Movie 5). Such fluorescence recovery was observed at the distal tip of all the short flagella ( $n=7$ ) that could be analysed.

### The length of the flagellum of short epimastigote cells does not increase after inhibition of cell division

In trypanosomes, the new flagellum is assembled while the existing one is maintained (Sherwin and Gull, 1989). This mature flagellum does not undergo turnover of its major axonemal components such as dynein arms or PFR components (Vincensini et al., 2018). This led us to propose a grow-and-lock model where the mature flagellum would be locked, preventing further elongation (Bertiaux and Bastin, 2020; Bertiaux et al., 2018b). In this context, two parameters cooperate to regulate length: the rate of elongation and the timing of the locking event that is linked to that of cell division. Manipulating one of these parameters resulted in the formation of flagella of different lengths (Bertiaux et al., 2018b).

Since IFT rate and frequency are equivalent in short and long flagella, one could consider that the short epimastigote cells have a tiny flagellum because of premature cell division, such that it takes place before the flagellum can fully elongate. This was observed in procyclic cells where the amount of IFT kinesin had been knocked down by RNA interference – the number of IFT trains was significantly reduced, leading to the formation of flagella that were too short at the time of cell division. However, inhibition of cell division resulted in the construction of a flagellum that ultimately reached the same length as the parental flagellum (Bertiaux et al., 2018b). To address whether a modification of the timing of cell division could explain the production of flagella with different length in the context of the natural cyclical development of trypanosomes, cell division was chemically inhibited in parasites isolated from infected tsetse cardia. Cells were maintained for 24 h in the presence of 10 mM teniposide, a drug that interferes with mitochondrial DNA segregation but not with basal body duplication nor with flagellum elongation (Robinson and Gull, 1991). In these conditions, cells cannot divide anymore. This arrests cell division and the impact on flagellum length can be analysed by IFAs using DAPI to stain DNA and the axonemal marker Mab25 to measure flagellum length (Fig. 7). First, long trypomastigote parasites were

for example serving as a rapidly mobilisable pool to facilitate flagellum elongation in the salivary glands when these cells differentiate to produce the attached epimastigote stage with a longer flagellum ( $\sim 14 \mu\text{m}$ ) (Rotureau et al., 2011).

Fluorescence recovery after photobleaching (FRAP) was used to evaluate whether this pool was dynamic. Short epimastigote cells were recovered from infected tsetse flies and an ROI was drawn around the IFT signal at the distal tip for bleaching with a brief laser pulse in order to extinguish the fluorescence signal (Fig. 6E, second panel). Fresh anterograde trains were then detected, emerging from the basal pool and travelling towards the tip of the flagellum (two examples are presented in Movie 5). Within seconds, these trains reached the tip and progressively replenished the distal pool (Fig. 6E, bottom panels). Retrograde trains were frequently seen starting from this distal pool, demonstrating that this material is actively participating in IFT

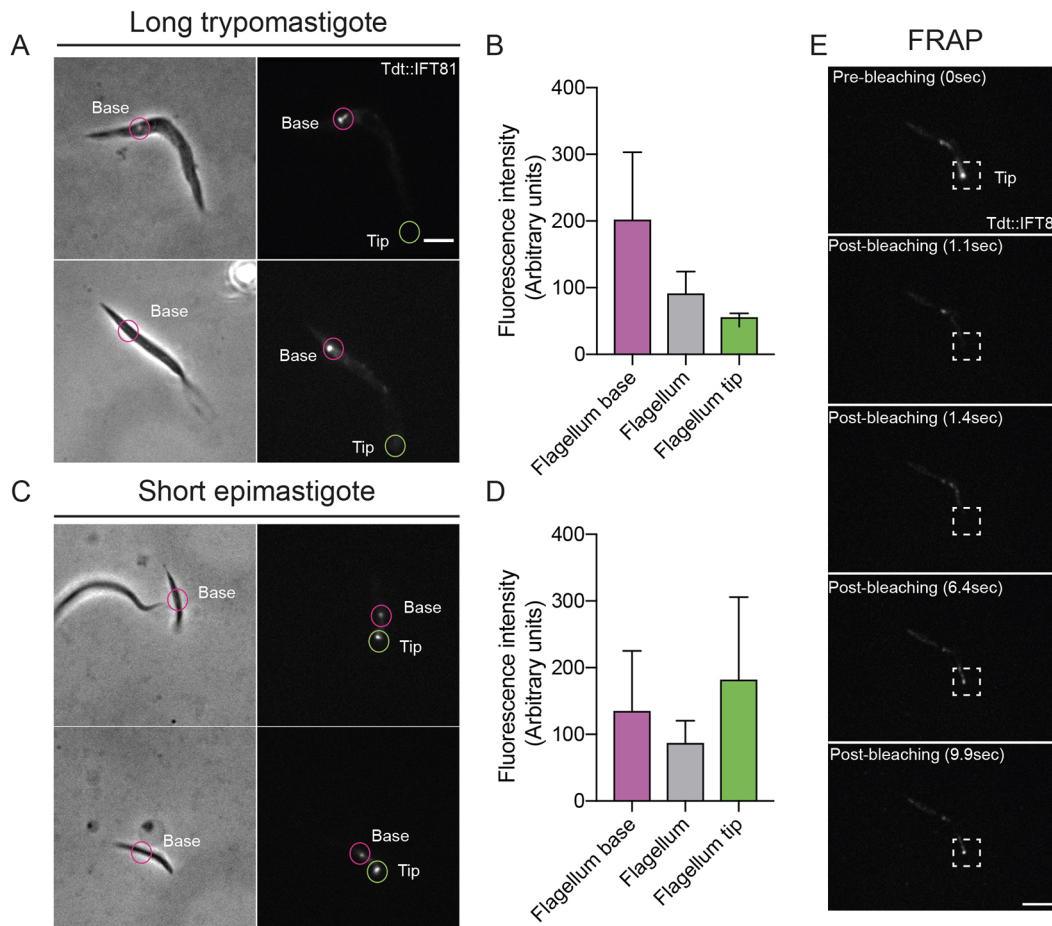

**Fig. 6. An IFT81 pool is present at the distal tip of short epimastigote flagella.** Images of cells expressing a TdTomato-tagged version of IFT81 isolated from the tsetse fly cardia at the long trypomastigote stage (A) or at the short epimastigote stage (C). The phase-contrast is shown on the right and the fluorescence signal is on the left. The base of the flagellum is indicated with a magenta circle and the tip with a green circle. The existence of an IFT pool at the tip is only detected in short epimastigote cells (also see Movie 4 for live cells). Scale bar: 5  $\mu$ m. (B,D) Quantification of the TdT::IFT81 mean fluorescence intensities at the base (magenta), in the middle region (grey) and the tip (green) of flagella in long trypomastigote (B,  $n=22$ ) or in short epimastigote (D) cells ( $n=17$ ). Results are mean $\pm$ s.d. (E) FRAP analysis in a short epimastigote trypanosome expressing the TdT::IFT81 fusion protein. The distal end of the flagellum was bleached with a brief laser pulse and the fluorescence recovery was monitored during 20 s. In the pre-bleach situation, the IFT pool is present at the distal tip; in the post-bleach situation, the signal becomes negative but rapid recovery was detected at the distal tip. The fluorescence signal is shown for the indicated times. The dotted square indicates the region around the distal tip. Scale bar: 3  $\mu$ m.

analysed. These cells assemble a tiny flagellum before nucleus migration and transformation in epimastigote cells (Lemos et al., 2020). Remarkably, the flagellum elongated from  $\sim 1$   $\mu$ m to an average of  $6.2\pm 2.8$   $\mu$ m (mean $\pm$ s.d.  $n=24$ ) (Fig. 7, bottom left panels), a value that is even higher than the average flagellum length in short epimastigote cells (Rotureau et al., 2011). Surprisingly, the length of the old flagellum was shorter ( $21.4\pm 4.5$   $\mu$ m) than that of untreated cells ( $\sim 28$   $\mu$ m), suggesting possible remodelling. We then turned our attention to dividing epimastigote cells treated with teniposide. The new flagellum retained a length of  $3.2\pm 1.2$   $\mu$ m and the old one of  $27.9\pm 3.54$   $\mu$ m ( $n=17$ ) (Fig. 7, right panels). These values are comparable to those of untreated cells observed in this and other experiments (Fig. 1) and from previous *in vivo* studies (Rotureau et al., 2011; Sharma et al., 2008; Van Den Abbeele et al., 1999). Therefore, the short flagellum failed to elongate further, suggesting that its length is restricted.

## DISCUSSION

IFT has been well studied in the procyclic stage of *T. brucei* in culture with a combination of functional and imaging studies. Here, transmission electron microscopy, FIB-SEM, IFAs and live-cell

analysis revealed that IFT is present and active in all accessible parasite stages in the midgut, cardia and salivary glands of infected tsetse flies. The total amount of flagellar IFT proteins directly correlated with the length of each flagellum from 3 to 30  $\mu$ m. A direct relationship between total amounts of IFT and final flagellum length was reported for the two equivalent flagella of *Chlamydomonas* (Marshall and Rosenbaum, 2001) and recently for the four pairs of flagella of different length in *Giardia lamblia* (McInally et al., 2019). There is, however, a significant difference between *Chlamydomonas* and *T. brucei*; in the first species, all of the IFT proteins are injected at once and train size progressively scales down leading to a reduction of the IFT concentration during elongation (Engel et al., 2009; Vannuccini et al., 2016) whereas in the *T. brucei* one, IFT protein recruitment to the flagellum progressively increases with length to maintain a constant concentration per unit of length (Bertiaux et al., 2018b).

Is there a causal relationship between amount of IFT and flagellum length? Reduction of IFT train frequency following knockdown of the IFT kinesins using RNAi leads to the formation of shorter flagella (Bertiaux et al., 2018b), supporting the causal relationship. In *Chlamydomonas*, shifting the temperature-sensitive

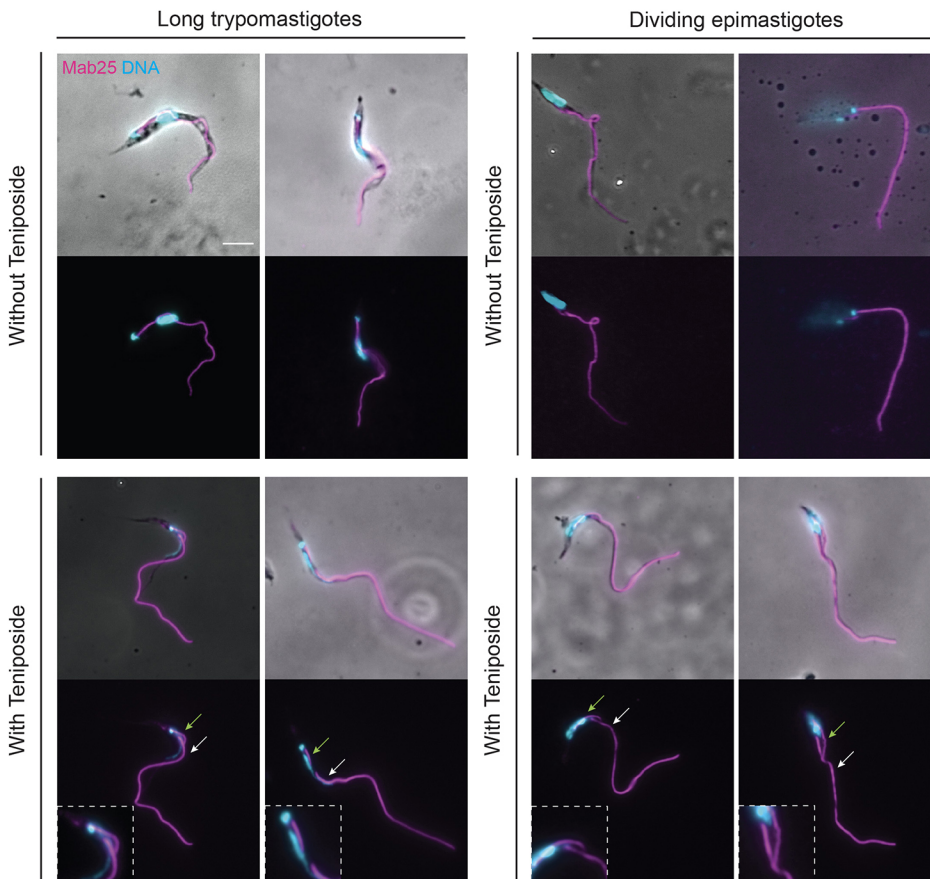

**Fig. 7. Inhibition of cell division has different impacts on flagellum length according to the trypanosome stage.** Parasites isolated from tsetse cardia were treated (bottom panels) or not (top panels) with teniposide for 24 h, fixed in methanol and stained with the Mab25 antibody to detect the axoneme (magenta) and DAPI to stain DNA (cyan). Top and bottom panels show untreated and treated cells, respectively. Two examples are shown for each situation. Green and white arrows show the new flagellum and the old flagellum, respectively. A substantial increase of the length of the new flagellum is obvious in long trypomastigote cells whereas no visible impact could be detected for dividing epimastigote cells. Insets show higher magnification of the region with the new flagellum. Scale bar: 5  $\mu$ m.

*fla10* kinesin mutant to intermediate temperature conditions results in a reduction in the number of IFT trains and in the formation of shorter flagella (Marshall and Rosenbaum, 2001). A simple model would be to postulate that flagellum length is controlled by the production of adequate amounts of IFT proteins. In this context, short and long epimastigote cells would synthesise less or more IFT proteins, respectively. Inhibition of cell division in kinesin RNAi conditions allowed trypanosomes to grow flagella twice as long without an increase in IFT trafficking (Bertiaux et al., 2018b). This model is further complicated by the existence of a large soluble pool of IFT proteins in the cytoplasm, reaching up to 50-fold the amount of IFT in the flagellum, at least in the case of *Chlamydomonas* (Ahmed et al., 2008; Wang et al., 2009). Because of the inherent difficulty in purifying intact flagella in wild-type trypanosomes, this could not be quantified directly but IFAs and observation of live cells expressing fluorescent IFT proteins indicate the presence of a substantial amount of IFT proteins in the cell body (Absalon et al., 2008).

Treatment of asymmetrically dividing epimastigote trypanosomes with teniposide showed that the short flagellum did not elongate further, which is in contrast with what was observed in the same experiment for long trypomastigote parasites coming from flies (Fig. 7) or procyclic trypanosomes in culture (Bertiaux et al., 2018b). Several possibilities could explain this result. First, this flagellum could be locked prematurely. Addition of a cap, modification of microtubules or presence of a barrier at the base of the flagellum are potential mechanisms for such a locking model (Bertiaux and Bastin, 2020). Second, this flagellum could be constructed on the principle of the balance between assembly and disassembly, but with a marked disassembly rate as proposed in *Giardia* where increasing amounts of the microtubule-depolymerising kinesin 13 are associated with

shorter flagellum length (McNally et al., 2019). The genome of *T. brucei* contains five kinesin 13 genes and KIN13-2 is the only one to be localised at the distal tip of both mature and growing flagella (Chan et al., 2010). KIN13-2 could therefore be a candidate to limit elongation at the short epimastigote stage. However, functional investigation in procyclic cells in culture has previously shown that the involvement of KIN13-2 on the control of flagellum length is marginal (Chan and Ersfeld, 2010). Third, the pool of cytoplasmic tubulin could be restricted as proposed in the limited soluble pool model (Goehring and Hyman, 2012). Intriguingly, the volume of the cytoplasm shrinks significantly at that stage (Rotureau et al., 2011) and a general reduction in cell activity has been observed (Natesan et al., 2007). In these conditions, IFT could remain active but if there is no or little tubulin transport, elongation could not continue further (Craft et al., 2015).

In the fly, it is commonly accepted that the short epimastigote cell is the one that establishes the infection in the salivary glands and that transforms in the attached epimastigote stage (Van Den Abbeele et al., 1999). This stage is characterised by a longer flagellum (14  $\mu$ m) that forms multiple membrane protrusions for adhesion to the epithelium of the salivary glands (Tetley and Vickerman, 1985). This means that the mechanisms restricting flagellum length must be abolished to allow further elongation. Based on the models proposed above, the flagellum could be unlocked, the activity of a depolymerising kinesin could be inhibited or the synthesis of tubulin and other flagellar precursors could resume. Finally, given the difficulty of visualising the establishment of the infection by a single parasite in the salivary glands of the tsetse fly, construction of a new, longer, flagellum followed by an asymmetric division cannot be formally excluded. Such a situation has been observed for the differentiation of the attached epimastigote to the trypomastigote



stage preceding the transformation in metacyclic parasites that are released in the saliva (Rotureau et al., 2012).

What processes could govern the formation of a longer flagellum? This is observed during the differentiation from the trypomastigote procyclic stage to the epimastigote stage in the cardia (Rotureau et al., 2011; Sharma et al., 2008; Van Den Abbeele et al., 1999). We propose that the new flagellum inherited from the last division of the procyclic stage is not locked and therefore can elongate further, giving rise to the long trypomastigote cells encountered in the cardia. If this flagellum is not locked, it must be more dynamic, meaning this could explain its unexpected shortening following inhibition of cell division while the new flagellum elongates from 1 to 6  $\mu\text{m}$  (Fig. 7). This suggests that the total amount of tubulin might be limiting, giving support to the soluble pool model as a possible mode of control of flagellum length. Further experimentation could address these models but would be greatly helped by an *in vitro* cultivation system. The overexpression of the RNA-binding protein 6 (RBP6) recapitulates some aspects of trypanosome development in the tsetse fly, including the production of metacyclic cells that are responsible for infection of mammalian hosts (Kolev et al., 2012). Unfortunately, it bypasses most intermediate stages, including the asymmetrically dividing epimastigote stage, and cells with short or long flagella have not been reported (Kolev et al., 2012).

Like multicellular organisms, trypanosomes have the ability to assemble flagella of different length. This is likely to be achieved by different mechanisms – if the grow-and-lock model can explain the situation encountered in procyclic trypanosomes, it does not seem to apply to the situation of dividing epimastigote cells, where a different process could be involved. Shortening of existing flagella has been reported (Peacock et al., 2018) or suspected (Ooi et al., 2016) in the related parasites *Trypanosoma congolense* and *Trypanosoma vivax*. In the monogenic parasite *Leptomonas*, the older flagellum undergoes rapid shortening prior to cell division (He et al., 2019). This feature had so far not been reported for the life cycle of *T. brucei*. However, it could be triggered here in experimental conditions for long trypomastigote cells present in the cardia, suggesting that there might be more hidden features in the control of flagellum length in trypanosomes. Overall, these results highlight the importance of studying different flagellated organisms as it can bring findings reflecting the diversity of cilia across evolution but also within single organisms such as humans.

## MATERIALS AND METHODS

### Trypanosome cell lines and cultures

Derivatives of the *T. brucei brucei* strain AnTat 1.1E Paris procyclic strain (Le Ray et al., 1977) were cultured at 27°C in SDM79 medium supplemented with hemin, 8 mM of glycerol and 10% fetal calf serum (FCS; Brun and Schonenberger, 1979). For bloodstream form trypanosomes, strain 427 was cultured in complete HMI-11 medium at 37°C in 5% CO<sub>2</sub> (Hirumi and Hirumi, 1989). IFT imaging in live cells was carried out with a cell line expressing a TdTomato::IFT81 fusion produced from its endogenous locus in AnTat1.1E PCF cells. The first 500 nucleotides of the *IFT81* gene (Gene DB number Tb927.10.2640) were chemically synthesised (GeneCust, Luxembourg) and cloned in frame with the TdTomato gene within the HindIII and ApaI sites of the p2675 vector (Bertiaux et al., 2018b; Kelly et al., 2007). The construct was linearised within the *IFT81* sequence with the enzyme XcmI, and nucleofected in the AnTat1.1E PCF cell line, leading to integration by homologous recombination in the *IFT81* endogenous locus and to the expression of the full-length coding sequence of IFT81 fused to TdTomato.

### Tsetse fly maintenance, infection and dissection

Tsetse flies (*Glossina morsitans morsitans*) were maintained, infected and dissected at the Institut Pasteur as previously described (Rotureau et al., 2011). Teneral males were collected 24 to 48 h post-eclosion and fed

through a silicone membrane with  $6 \times 10^6$ – $9 \times 10^6$  parasites/ml in SDM-79 medium supplemented with 10% FCS, 8 mM glycerol and 10 mM glutathione for their first meal (MacLeod et al., 2007). Flies were infected with the *T. brucei brucei* AnTat 1.1E Paris wild-type (Le Ray et al., 1977) and AnTat 1.1E IFT81::TdT strains. Flies were then maintained in Roubaud cages for 1 month at 27°C and 50% humidity and fed three times a week with mechanically defibrinated sheep blood. Flies were starved for at least 48 h before being individually dissected 28 days after ingestion of the infected meal. In our colony conditions, the average midgut infection rates usually obtained with AnTat 1.1E Paris wild-type strain are 50–60% in the midgut and 10–15% in the salivary glands. Salivary glands were first rapidly dissected into a drop of PBS or culture medium. The whole tsetse alimentary tract was then dissected and arranged lengthways for assessing the parasite presence. The cardia and anterior midgut were physically separated from the posterior midgut in a distinct PBS drop. Tissues were dilacerated to allow parasites to spread in PBS; parasites were recovered and treated for further experiments no more than 15 min after dissection.

### Electron microscopy

For electron microscopy sample preparation, the entire digestive tracts of 11 flies were placed in a drop of 0.1 M cacodylate buffer (pH 7.2) and fixed in 2.5% glutaraldehyde (Sigma-Aldrich) and 4% paraformaldehyde. Entire cardia were then separated from the digestive tract and transferred to 1.5 ml Eppendorf tubes containing 500  $\mu\text{l}$  of 2.5% glutaraldehyde and 4% paraformaldehyde in 0.1 M cacodylate buffer (pH 7.2) for 1 or 2 h at 4°C. Fixed samples were washed three times by the addition of fresh 0.1 M cacodylate buffer (pH 7.2) buffer and post-fixed in 1% osmium (EMS) in 0.1 M cacodylate buffer (pH 7.2) enriched with 1.5% potassium ferrocyanide (Sigma-Aldrich) for 50 min in the dark under agitation. Samples were gradually dehydrated in an acetone (Sigma-Aldrich) series from 50% to 100%. Cardia were oriented along longitudinal or transversal axes and embedded in PolyBed812 resin (EMS) according to the ‘hard’ protocol (Luft, 1961), followed by polymerisation for 48 h at 60°C. After embedding, 500 nm semi-thin sectioning was performed and sections stained with Toluidine Blue to find the ROI containing trypanosomes. Semi-thin sections were used like a map to mill the sample precisely in the ROI by FIB. For TEM analysis, ultra-thin sections (70 nm) were obtained using an ultramicrotome (Leica EM UC7). Sections were post-stained for 40 min with 4% uranyl acetate and 10 min with 3% lead citrate and observed using a FEI Tecnai T12 120 kV. For FIB-SEM, the embedded sample was coated with 20 nm of Au/Pd and directly placed in the chamber of a FESEM Zeiss Auriga microscope equipped with a CrossBeam workstation (Zeiss) and acquired using ATLAS 3D software (Zeiss) as described previously (Bertiaux et al., 2018a).

### Immunofluorescence

Cultured parasites were washed twice in PBS and spread directly into poly-L-lysine-coated slides. The slides with cultured parasites or parasites isolated from tsetse flies were air-dried for 10 min, fixed in methanol at –20°C for 30 s and rehydrated for 10 min in PBS. For immuno-detection, slides were incubated with primary antibodies diluted in PBS with 0.1% bovine serum albumin (BSA) for 1 h at 37°C in a humid chamber. The antibodies used were the Mab25 mouse monoclonal antibody recognising TbSAXO1 (a gift from Derrick Robinson, University of Bordeaux, France), a protein found all along the trypanosome axoneme at 1:10 (Dacheux et al., 2012; Pradel et al., 2006), an anti-IFT172 mouse monoclonal antibody diluted at 1:200 (Absalon et al., 2008), an anti-IFT22 mouse polyclonal antiserum diluted at 1:200 (Adhiambo et al., 2009), an anti-FLAM8 rabbit polyclonal antibody diluted at 1:500 (a kind gift of Paul McKean, Lancaster University, UK). Three washes of 10 min were performed and the secondary antibody diluted in PBS with 0.1% BSA was added on the slides. Subclass-specific secondary antibodies coupled to Alexa Fluor 488 and Cy3 (1:400; Jackson ImmunoResearch Laboratories, West Grove, PA) were used for double labelling. After an incubation of 45 min, slides were washed three times in PBS for 10 min and DAPI (2  $\mu\text{g}/\mu\text{l}$ ) was added to stain DNA. Slides were mounted with coverslips using ProLong antifade reagent (Invitrogen). Sample observation was performed using a DMI4000 microscope equipped with a 100 $\times$  NA 1.4 objective (Leica, Wetzlar, Germany) and images were captured with an ORCA-03G Hamamatsu camera. Pictures were analysed

using the ImageJ 1.47g13 software (National Institutes of Health, Bethesda, MD). For presentation purposes and only after analysis, images were merged using Photoshop CS6 (Adobe). To quantify fluorescence intensity associated with the IFT signal (IFT22 or IFT172), the Mab25 signal was used to draw the ROI encompassing the length of the axoneme excluding the flagellum base (Dacheux et al., 2012). Using ImageJ, the total amount of IFT fluorescence was measured using the fluorescence associated with each pixel of the ROI and removing the background associated with the minimum of fluorescence detected in that ROI.

### Live imaging of parasites isolated from tsetse fly

Fly dissections were performed in SDM-79 medium. The midgut, cardia and salivary glands were rapidly separated in different drops. After a visual inspection to confirm the presence of parasite, each organ was kept in 15  $\mu$ l of SDM-79 medium supplemented with serum in Eppendorf tubes. To increase parasite density, six organs were pooled in each tube and dilacerated. A SDM-79 solution containing 4% agar was heat-liquefied and progressively cooled for being mixed with the medium containing the freshly isolated parasites (1:1). For live video microscopy, the solution was spread on a slide, covered with a coverslip and rapidly observed at room temperature under the DMI4000 microscope. Videos were acquired using an Evolve 512 EMCCD Camera (Photometrics, Tucson, AZ) driven by the Metaview acquisition software (Molecular Probes, Sunnyvale, CA). IFT trafficking was recorded at 100 ms per frame during 30 s. Kymographs were extracted and analysed using Quia software as described previously (Buisson et al., 2013; Chenouard et al., 2010).

### FRAP analysis

For FRAP analysis of cells expressing Tdt::IFT81, an Axiovert 200 inverted microscope (Zeiss) equipped with an oil immersion objective (magnification  $\times$ 100 with 1.4 numerical aperture) and a spinning disc confocal head (CSU22, Yokogawa) was used (Buisson et al., 2013). Movies were acquired using Velocity software with an EMCCD camera (C-9100, Hamamatsu) operating in streaming mode. The samples were kept at 27°C using a thermo-controlled chamber. Sequences of 30 s were acquired at an exposure time of 0.1 s per frame.

### Inhibition of cell division

Flies were dissected in SDM-79 medium and, after visual inspection, three positive proventriculi were pooled and resuspended in 500  $\mu$ l of SDM-79 supplemented with hemin, 10% fetal bovine serum and 10 mM glycerol in 24-well plates. For inhibiting cell division, teniposide (Sigma SML0609), a topoisomerase II inhibitor, was dissolved in DMSO and added to isolated parasites from tsetse flies at a final concentration of 10 mM for 24 h (Bertiaux et al., 2018b; Robinson and Gull, 1991). In the control wells, the same volume of DMSO alone was added (6.3  $\mu$ l). Parasites were spread on poly-lysine-coated slides and allowed to sediment for 30 min at 27°C before being fixed and processed for immunofluorescence.

### Acknowledgements

We thank Aline Couzols and Christelle Travail   for help with tsetse fly infection and dissection; Moara Lemos for help with sample preparation and Derrick Robinson (University of Bordeaux) for providing the Mab25 antibody. We are grateful to the Photonic Bioimaging and Ultrastructural Bioimaging facilities for access to their equipment, and to G  rard Pehaud-Arnaudet for training in electron microscopy.

### Competing interests

The authors declare no competing or financial interests.

### Author contributions

Conceptualization: E.B., B.R., P.B.; Methodology: E.B., A.M.; Formal analysis: E.B., A.M.; Writing - original draft: E.B., P.B.; Writing - review & editing: E.B., A.M., B.R., P.B.; Supervision: B.R., P.B.; Funding acquisition: P.B.

### Funding

E.B. was supported by fellowships from French National Ministry for Research and Technology (doctoral school CDV515) and from La Fondation pour la Recherche M  dicale (FDT20170436836). This work was funded by La Fondation pour la Recherche M  dicale (Equipe FRM DEQ20150734356) and by a French

Government (Agence Nationale de la Recherche) Investissement d'Avenir programme, Laboratoire d'Excellence "Integrative Biology of Emerging Infectious Diseases" (ANR-10-LABX-62-IBEID). We are also grateful for support for FESEM Zeiss Auriga and Elyra PS1 equipment from the French Government Programme Investissements d'Avenir France Bioimaging (FBI, N   ANR-10-INSB-04-01) and from a DIM-Malinf grant from the R  gion Ile-de-France.

### Supplementary information

Supplementary information available online at <https://jcs.biologists.org/lookup/doi/10.1242/jcs.248989.supplemental>

### Peer review history

The peer review history is available online at <https://jcs.biologists.org/lookup/doi/10.1242/jcs.248989.reviewer-comments.pdf>

### References

- Absalon, S., Blisnick, T., Kohl, L., Toutirais, G., Dor  , G., Julkowska, D., Tavenet, A. and Bastin, P. (2008). Intraflagellar transport and functional analysis of genes required for flagellum formation in trypanosomes. *Mol. Biol. Cell* **19**, 929-944. doi:10.1091/mbc.e07-08-0749
- Adhiambo, C., Blisnick, T., Toutirais, G., Delannoy, E. and Bastin, P. (2009). A novel function for the atypical small G protein Rab-like 5 in the assembly of the trypanosome flagellum. *J. Cell Sci.* **122**, 834-841. doi:10.1242/jcs.040444
- Ahmed, N. T., Gao, C., Lucker, B. F., Cole, D. G. and Mitchell, D. R. (2008). ODA16 aids axonemal outer row dynein assembly through an interaction with the intraflagellar transport machinery. *J. Cell Biol.* **183**, 313-322. doi:10.1083/jcb.200802025
- Avidor-Reiss, T. and Leroux, M. R. (2015). Shared and distinct mechanisms of compartmentalized and cytosolic ciliogenesis. *Curr. Biol.* **25**, R1143-R1150. doi:10.1016/j.cub.2015.11.001
- Bastin, P., MacRae, T. H., Francis, S. B., Matthews, K. R. and Gull, K. (1999). Flagellar morphogenesis: protein targeting and assembly in the paraflagellar rod of trypanosomes. *Mol. Cell. Biol.* **19**, 8191-8200. doi:10.1128/MCB.19.12.8191
- Bertiaux, E. and Bastin, P. (2020). Dealing with several flagella in the same cell. *Cell. Microbiol.* **22**, e13162. doi:10.1111/cmi.13162
- Bertiaux, E., Mallet, A., Fort, C., Blisnick, T., Bonnefoy, S., Jung, J., Lemos, M., Marco, S., Vaughan, S., Tr  pout, S. et al. (2018a). Bidirectional intraflagellar transport is restricted to two sets of microtubule doublets in the trypanosome flagellum. *J. Cell Biol.* **217**, 4284-4297. doi:10.1083/jcb.201805030
- Bertiaux, E., Morga, B., Blisnick, T., Rotureau, B. and Bastin, P. (2018b). A grow-and-lock model for the control of flagellum length in trypanosomes. *Curr. Biol.* **28**, 3802-3814.e3. doi:10.1016/j.cub.2018.10.031
- Bhogaraju, S., Cajanek, L., Fort, C., Blisnick, T., Weber, K., Taschner, M., Mizuno, N., Lamla, S., Bastin, P., Nigg, E. A. et al. (2013). Molecular basis of tubulin transport within the cilium by IFT74 and IFT81. *Science* **341**, 1009-1012. doi:10.1126/science.1240985
- Blisnick, T., Buisson, J., Absalon, S., Marie, A., Cayet, N. and Bastin, P. (2014). The intraflagellar transport dynein complex of trypanosomes is made of a heterodimer of dynein heavy chains and of light and intermediate chains of distinct functions. *Mol. Biol. Cell* **25**, 2620-2633. doi:10.1091/mbc.e14-05-0961
- Broekhuis, J. R., Leong, W. Y. and Jansen, G. (2013). Regulation of cilium length and intraflagellar transport. *Int. Rev. Cell Mol. Biol.* **303**, 101-138. doi:10.1016/B978-0-12-407697-6.00003-9
- Brun, R. and Schonenberger. (1979). Cultivation and in vitro cloning or procyclic culture forms of *Trypanosoma brucei* in a semi-defined medium. Short communication. *Acta Trop.* **36**, 289-292.
- Buisson, J., Chenouard, N., Lagache, T., Blisnick, T., Olivo-Marin, J.-C. and Bastin, P. (2013). Intraflagellar transport proteins cycle between the flagellum and its base. *J. Cell Sci.* **126**, 327-338. doi:10.1242/jcs.117069
- Chan, K. Y. and Ersfeld, K. (2010). The role of the Kinesin-13 family protein TbKif13-2 in flagellar length control of *Trypanosoma brucei*. *Mol. Biochem. Parasitol.* **174**, 137-140. doi:10.1016/j.molbiopara.2010.08.001
- Chan, K. Y., Matthews, K. R. and Ersfeld, K. (2010). Functional characterisation and drug target validation of a mitotic kinesin-13 in *Trypanosoma brucei*. *PLoS Pathog.* **6**, e1001050. doi:10.1371/journal.ppat.1001050
- Chenouard, N., Buisson, J., Bloch, I., Bastin, P. and Olivo-Marin, J. C. (2010). Curvelet analysis of kymograph for tracking bi-directional particles in fluorescence microscopy images. *IEEE International Conference on Image Processing*, pp. 3657-3660. doi:10.1109/ICIP.2010.5652479
- Craft, J. M., Harris, J. A., Hyman, S., Kner, P. and Lechtreck, K. F. (2015). Tubulin transport by IFT is upregulated during ciliary growth by a cilium-autonomous mechanism. *J. Cell Biol.* **208**, 223-237. doi:10.1083/jcb.201409036
- Dacheux, D., Landrein, N., Thonnus, M., Gilbert, G., Sahin, A., Wodrich, H., Robinson, D. R. and Bonhivers, M. (2012). A MAP6-related protein is present in protozoa and is involved in flagellum motility. *PLoS ONE* **7**, e31344. doi:10.1371/journal.pone.0031344
- Davidge, J. A., Chambers, E., Dickinson, H. A., Towers, K., Ginger, M. L., McKean, P. G. and Gull, K. (2006). Trypanosome IFT mutants provide insight into

- the motor location for mobility of the flagella connector and flagellar membrane formation. *J. Cell Sci.* **119**, 3935-3943. doi:10.1242/jcs.03203
- Dutcher, S. K.** (2014). The awesome power of dikaryons for studying flagella and basal bodies in *Chlamydomonas reinhardtii*. *Cytoskeleton (Hoboken)* **71**, 79-94. doi:10.1002/cm.21157
- Engel, B. D., Ludington, W. B. and Marshall, W. F.** (2009). Intraflagellar transport particle size scales inversely with flagellar length: revisiting the balance-point length control model. *J. Cell Biol.* **187**, 81-89. doi:10.1083/jcb.200812084
- Franklin, J. B. and Ullu, E.** (2010). Biochemical analysis of PIFTC3, the *Trypanosoma brucei* orthologue of nematode DYF-13, reveals interactions with established and putative intraflagellar transport components. *Mol. Microbiol.* **78**, 173-186. doi:10.1111/j.1365-2958.2010.07322.x
- Goehring, N. W. and Hyman, A. A.** (2012). Organelle growth control through limiting pools of cytoplasmic components. *Curr. Biol.* **22**, R330-R339. doi:10.1016/j.cub.2012.03.046
- Hao, L., Thein, M., Brust-Mascher, I., Civelekoglu-Scholey, G., Lu, Y., Acar, S., Prevo, B., Shaham, S. and Scholey, J. M.** (2011). Intraflagellar transport delivers tubulin isoforms to sensory cilium middle and distal segments. *Nat. Cell Biol.* **13**, 790-798. doi:10.1038/ncb2268
- He, C. Y., Singh, A. and Yurchenko, V.** (2019). Cell cycle-dependent flagellar disassembly in a firebug trypanosomatid *Leptomonas pyrrocoris*. *mBio* **10**, e02424-19. doi:10.1128/mBio.02424-19
- Hirumi, H. and Hirumi, K.** (1989). Continuous cultivation of *Trypanosoma brucei* blood stream forms in a medium containing a low concentration of serum protein without feeder cell layers. *J. Parasitol.* **75**, 985-989. doi:10.2307/3282883
- Huet, D., Blisnick, T., Perrot, S. and Bastin, P.** (2014). The GTPase IFT27 is involved in both anterograde and retrograde intraflagellar transport. *eLife* **3**, e02419. doi:10.7554/eLife.02419
- Huet, D., Blisnick, T., Perrot, S. and Bastin, P.** (2019). IFT25 is required for the construction of the trypanosome flagellum. *J. Cell Sci.* **132**, jcs228296. doi:10.1242/jcs.228296
- Ishikawa, H. and Marshall, W. F.** (2017). Intraflagellar transport and ciliary dynamics. *Cold Spring Harb. Perspect. Biol.* **9**, a021998. doi:10.1101/cshperspect.a021998
- Jensen, V. L., Lambacher, N. J., Li, C., Mohan, S., Williams, C. L., Inglis, P. N., Yoder, B. K., Blacque, O. E. and Leroux, M. R.** (2018). Role for intraflagellar transport in building a functional transition zone. *EMBO Rep.* **19**, e45862. doi:10.15252/embr.201845862
- Johnson, K. A. and Rosenbaum, J. L.** (1992). Polarity of flagellar assembly in *Chlamydomonas*. *J. Cell Biol.* **119**, 1605-1611. doi:10.1083/jcb.119.6.1605
- Keeling, J., Tsiokas, L. and Maskey, D.** (2016). Cellular mechanisms of ciliary length control. *Cells* **5**, 6. doi:10.3390/cells5010006
- Kelly, S., Reed, J., Kramer, S., Ellis, L., Webb, H., Sunter, J., Salje, J., Marinsek, N., Gull, K., Wickstead, B. et al.** (2007). Functional genomics in *Trypanosoma brucei*: a collection of vectors for the expression of tagged proteins from endogenous and ectopic gene loci. *Mol. Biochem. Parasitol.* **154**, 103-109. doi:10.1016/j.molbiopara.2007.03.012
- Kohl, L., Robinson, D. and Bastin, P.** (2003). Novel roles for the flagellum in cell morphogenesis and cytokinesis of trypanosomes. *EMBO J.* **22**, 5336-5346. doi:10.1093/emboj/cdg518
- Kolev, N. G., Ramey-Butler, K., Cross, G. A. M., Ullu, E. and Tschudi, C.** (2012). Developmental progression to infectivity in *Trypanosoma brucei* triggered by an RNA-binding protein. *Science* **338**, 1352-1353. doi:10.1126/science.1229641
- Kozminski, K. G., Johnson, K. A., Forscher, P. and Rosenbaum, J. L.** (1993). A motility in the eukaryotic flagellum unrelated to flagellar beating. *Proc. Natl. Acad. Sci. USA* **90**, 5519-5523. doi:10.1073/pnas.90.12.5519
- Kozminski, K. G., Beech, P. L. and Rosenbaum, J. L.** (1995). The *Chlamydomonas* kinesin-like protein FLA10 is involved in motility associated with the flagellar membrane. *J. Cell Biol.* **131**, 1517-1527. doi:10.1083/jcb.131.6.1517
- Le Ray, D., Barry, J. D., Easton, C. and Vickerman, K.** (1977). First tsetse fly transmission of the "AnTat" serodeme of *Trypanosoma brucei*. *Ann. Soc. Belg. Med. Trop.* **57**, 369-381.
- Lechtreck, K. F., Van De Weghe, J. C., Harris, J. A. and Liu, P.** (2017). Protein transport in growing and steady-state cilia. *Traffic* **18**, 277-286. doi:10.1111/tra.12474
- Lemos, M., Mallet, A., Bertiaux, E., Imbert, A., Rotureau, B. and Bastin, P.** (2020). Timing and original features of flagellum assembly in trypanosomes during development in the tsetse fly. *Parasit. Vectors* **13**, 169. doi:10.1186/s13071-020-04026-0
- Liang, Y., Zhu, X., Wu, Q. and Pan, J.** (2018). Ciliary length sensing regulates IFT entry via changes in FLA8/KIF3B phosphorylation to control ciliary assembly. *Curr. Biol.* **28**, 2429-2435.e3. doi:10.1016/j.cub.2018.05.069
- Ludington, W. B., Wemmer, K. A., Lechtreck, K. F., Witman, G. B. and Marshall, W. F.** (2013). Avalanche-like behavior in ciliary import. *Proc. Natl. Acad. Sci. USA* **110**, 3925-3930. doi:10.1073/pnas.1217354110
- Luft, J. H.** (1961). Improvements in epoxy resin embedding methods. *J. Biophys. Biochem. Cytol.* **9**, 409-414. doi:10.1083/jcb.9.2.409
- MacLeod, E. T., Maudlin, I., Darby, A. C. and Welburn, S. C.** (2007). Antioxidants promote establishment of trypanosome infections in tsetse. *Parasitology* **134**, 827-831. doi:10.1017/S0031182007002247
- Marshall, W. F. and Rosenbaum, J. L.** (2001). Intraflagellar transport balances continuous turnover of outer doublet microtubules: implications for flagellar length control. *J. Cell Biol.* **155**, 405-414. doi:10.1083/jcb.200106141
- McInally, S. G., Kondev, J. and Dawson, S. C.** (2019). Length-dependent disassembly maintains four different flagellar lengths in *Giardia*. *Elife* **8**, e48694. doi:10.7554/eLife.48694.sa2
- Morga, B. and Bastin, P.** (2013). Getting to the heart of intraflagellar transport using *Trypanosoma* and *Chlamydomonas* models: the strength is in their differences. *Cilia* **2**, 16. doi:10.1186/2046-2530-2-16
- Natesan, S. K. A., Peacock, L., Matthews, K., Gibson, W. and Field, M. C.** (2007). Activation of endocytosis as an adaptation to the mammalian host by trypanosomes. *Eukaryot. Cell* **6**, 2029-2037. doi:10.1128/EC.00213-07
- Ooi, C. P., Schuster, S., Cren-Travaille, C., Bertiaux, E., Cosson, A., Goyard, S., Perrot, S. and Rotureau, B.** (2016). The cyclical development of trypanosome vivax in the tsetse fly involves an asymmetric division. *Front. Cell Infect. Microbiol.* **6**, 115. doi:10.3389/fcimb.2016.00115
- Peacock, L., Kay, C., Bailey, M. and Gibson, W.** (2018). Shape-shifting trypanosomes: Flagellar shortening followed by asymmetric division in *Trypanosoma congolense* from the tsetse proventriculus. *PLoS Pathog.* **14**, e1007043. doi:10.1371/journal.ppat.1007043
- Pradel, L. C., Bonhivers, M., Landrein, N. and Robinson, D. R.** (2006). NIMA-related kinase TbNRKC is involved in basal body separation in *Trypanosoma brucei*. *J. Cell Sci.* **119**, 1852-1863. doi:10.1242/jcs.02900
- Prevo, B., Scholey, J. M. and Peterman, E. J. G.** (2017). Intraflagellar transport: mechanisms of motor action, cooperation, and cargo delivery. *FEBS J.* **284**, 2905-2931. doi:10.1111/febs.14068
- Ringo, D. L.** (1967). Flagellar motion and fine structure of the flagellar apparatus in *Chlamydomonas*. *J. Cell Biol.* **33**, 543-571. doi:10.1083/jcb.33.3.543
- Robinson, D. R. and Gull, K.** (1991). Basal body movements as a mechanism for mitochondrial genome segregation in the trypanosome cell cycle. *Nature* **352**, 731-733. doi:10.1038/352731a0
- Rotureau, B., Subota, I. and Bastin, P.** (2011). Molecular bases of cytoskeleton plasticity during the *Trypanosoma brucei* parasite cycle. *Cell. Microbiol.* **13**, 705-716. doi:10.1111/j.1462-5822.2010.01566.x
- Rotureau, B., Subota, I., Buisson, J. and Bastin, P.** (2012). A new asymmetric division contributes to the continuous production of infective trypanosomes in the tsetse fly. *Development* **139**, 1842-1850. doi:10.1242/dev.072611
- Sharma, R., Peacock, L., Gluenz, E., Gull, K., Gibson, W. and Carrington, M.** (2008). Asymmetric cell division as a route to reduction in cell length and change in cell morphology in trypanosomes. *Protist* **159**, 137-151. doi:10.1016/j.protis.2007.07.004
- Sherwin, T. and Gull, K.** (1989). The cell division cycle of *Trypanosoma brucei*: timing of event markers and cytoskeletal modulations. *Phil. Trans. R. Soc. Lond. B* **323**, 573-588. doi:10.1098/rstb.1989.0037
- Tetley, L. and Vickerman, K.** (1985). Differentiation in *Trypanosoma brucei*: host-parasite cell junctions and their persistence during acquisition of the variable antigen coat. *J. Cell Sci.* **74**, 1-19.
- Van Den Abeele, J., Claes, Y., van Bockstaele, D., Le Ray, D. and Coosemans, M.** (1999). *Trypanosoma brucei* spp. development in the tsetse fly: characterization of the post-mesocyclic stages in the foregut and proboscis. *Parasitology* **118**, 469-478. doi:10.1017/S0031182099004217
- Vannuccini, E., Paccagnini, E., Cantele, F., Gentile, M., Dini, D., Fino, F., Diener, D., Mencarelli, C. and Lupetti, P.** (2016). Two classes of short intraflagellar transport train with different 3D structures are present in *Chlamydomonas* flagella. *J. Cell Sci.* **129**, 2064-2074. doi:10.1242/jcs.183244
- Vickerman, K.** (1962). The mechanism of cyclical development in trypanosomes of the *Trypanosoma brucei* sub-group: an hypothesis based on ultrastructural observations. *Trans. R. Soc. Trop. Med. Hyg.* **56**, 487-495. doi:10.1016/0035-9203(62)90072-X
- Vincensini, L., Blisnick, T., Bertiaux, E., Hutchinson, S., Georgikou, C., Ooi, C.-P. and Bastin, P.** (2018). Flagellar incorporation of proteins follows at least two different routes in trypanosomes. *Biol. Cell* **110**, 33-47. doi:10.1111/boc.201700052
- Wang, Y., Ren, Y. and Pan, J.** (2019). Regulation of flagellar assembly and length in *Chlamydomonas* by LF4, a MAPK-related kinase. *FASEB J.* **33**, 6431-6441. doi:10.1096/fj.201802375RR
- Wang, Z., Fan, Z.-C., Williamson, S. M. and Qin, H.** (2009). Intraflagellar transport (IFT) protein IFT25 is a phosphoprotein component of IFT complex B and physically interacts with IFT27 in *Chlamydomonas*. *PLoS ONE* **4**, e5384. doi:10.1371/journal.pone.0005384
- Wren, K. N., Craft, J. M., Tritschler, D., Schauer, A., Patel, D. K., Smith, E. F., Porter, M. E., Kner, P. and Lechtreck, K. F.** (2013). A differential cargo-loading model of ciliary length regulation by IFT. *Curr. Biol.* **23**, 2463-2471. doi:10.1016/j.cub.2013.10.044
